# Supplementary material for: A highly selective and light-up red emissive fluorescent probe for imaging of penicillin G amidase inBacillus cereus
Source: Royal Society of Chemistry journal article supplement (doi:10.1039/c9nj00890j), 2019-01-01
Supplement: c9nj00890j1.pdf [file c9nj00890j1.pdf]

## Electronic Supplementary Information

# A highly selective and light-up red emissive fluorescent probe for imaging of penicillin G amidase in *Bacillus cereus*

Jianguo Wang,<sup>‡a</sup> Qingqing Chen,<sup>‡a</sup> Jie Wu,<sup>a</sup> Wenping Zhu,<sup>a</sup> Yongquan Wu,<sup>a</sup> Xiaolin Fan,<sup>a</sup>

Guanxin Zhang,<sup>b</sup> Yibao Li <sup>\*a</sup> and Guoyu Jiang<sup>\*a</sup>

<sup>a</sup>*Key Laboratory of Organo-Pharmaceutical Chemistry, Gannan Normal University, Ganzhou*

*341000, P. R. China*

<sup>b</sup>*Organic Solids Laboratory, Institute of Chemistry, Chinese Academy of Sciences, Beijing 100190,*

*P. R. China.*

## Table of Content

|                                                                                          |       |
|------------------------------------------------------------------------------------------|-------|
| Characterizations of compound <b>2</b> , HCyNB and HCyN .....                            | S3-S6 |
| HRMS spectrum of HCyNB after incubation with PGA .....                                   | S7    |
| Time courses of fluorescence intensity of HCyNB in the presence of PGA.....              | S7    |
| Stability of HCyNB.....                                                                  | S7    |
| Lineweaver-Burk plot for the enzyme-catalyzed reaction .....                             | S8    |
| Confocal fluorescence microscope images of HCyNB in <i>Bacillus cereus</i> .....         | S8    |
| Average PL intensity of HCyNB in CMCCB 63301 vs the concentration of PGA inhibitor ..... | S9    |

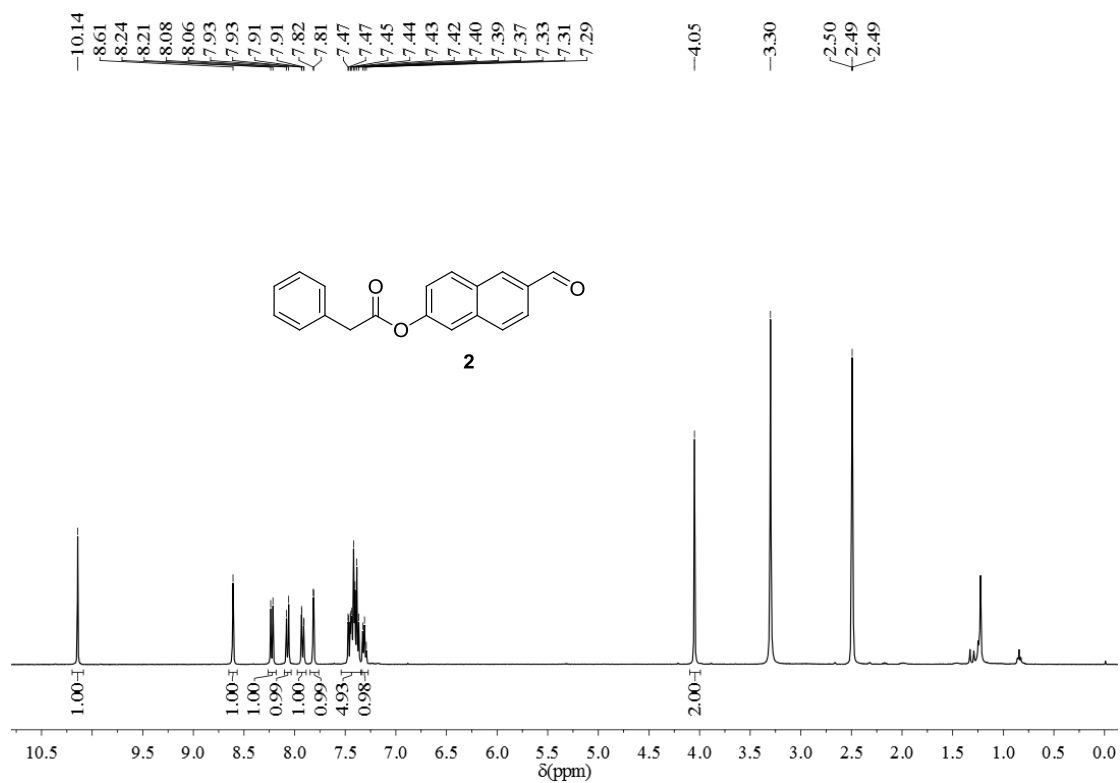

**Fig. S1.**  $^1\text{H NMR}$  of 6-formylnaphthalen-2-yl acetate (compound **2**) in  $d_6$ -DMSO.

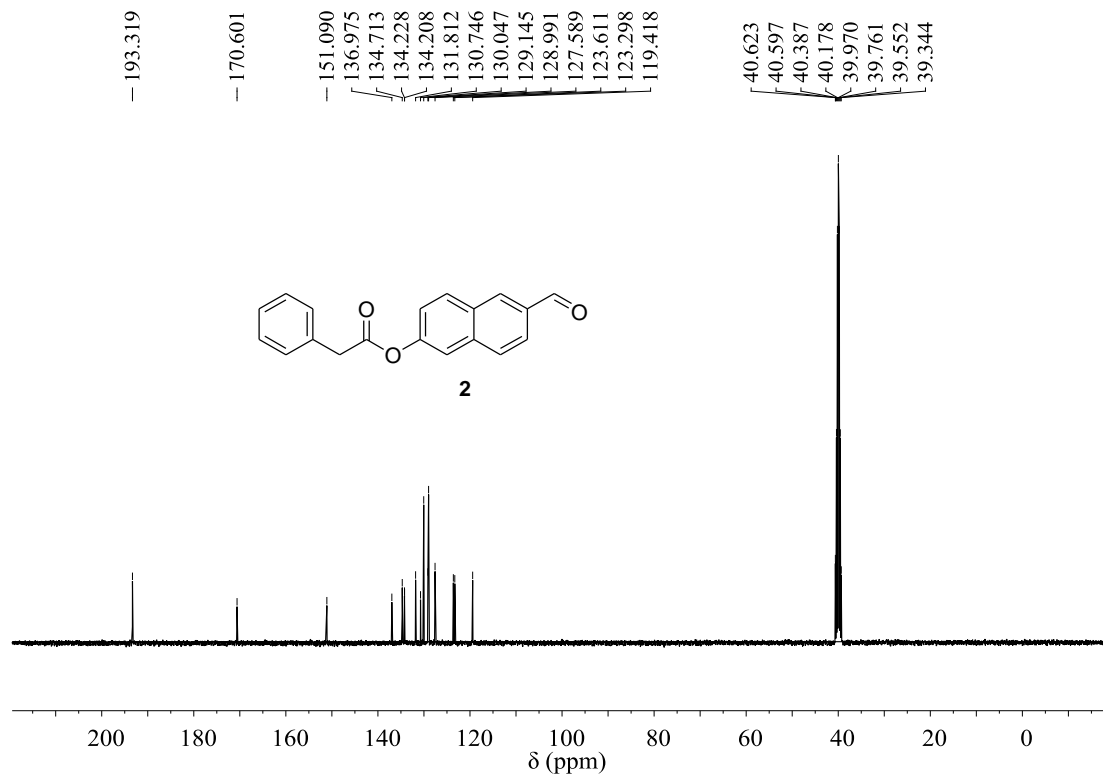

**Fig. S2.**  $^{13}\text{C NMR}$  of 6-formylnaphthalen-2-yl acetate (compound **2**) in  $d_6$ -DMSO.

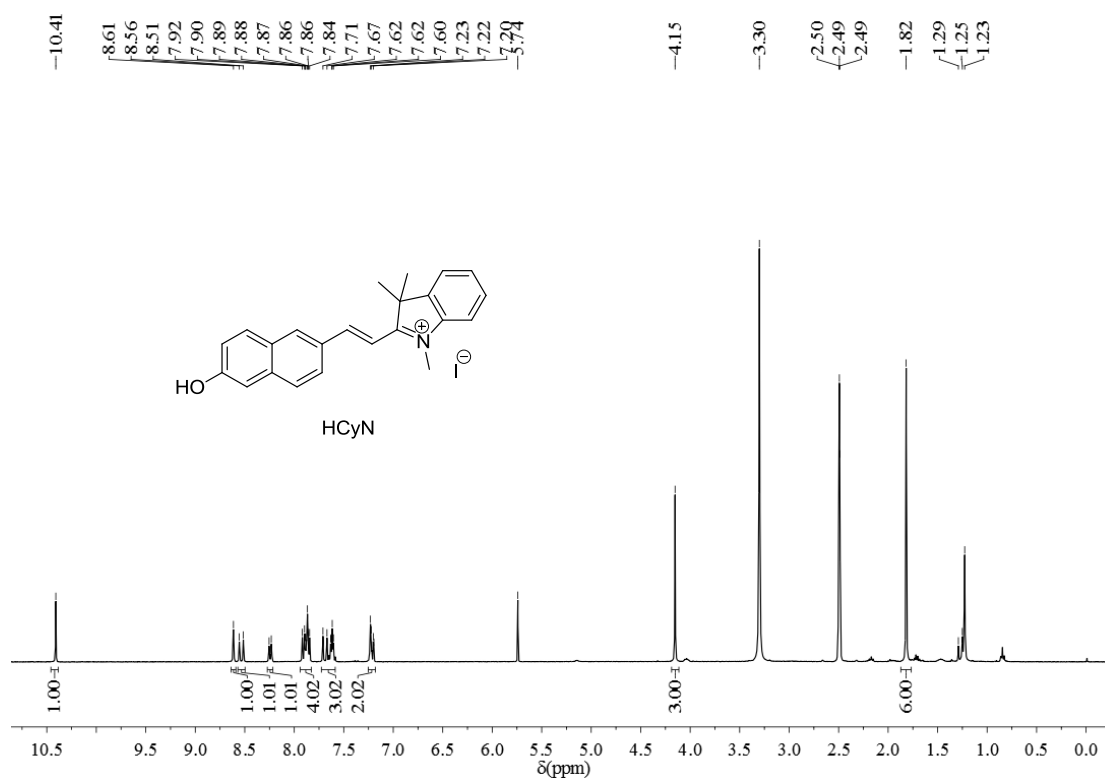

**Fig. S3.** <sup>1</sup>H NMR of HCyN in *d*<sub>6</sub>-DMSO.

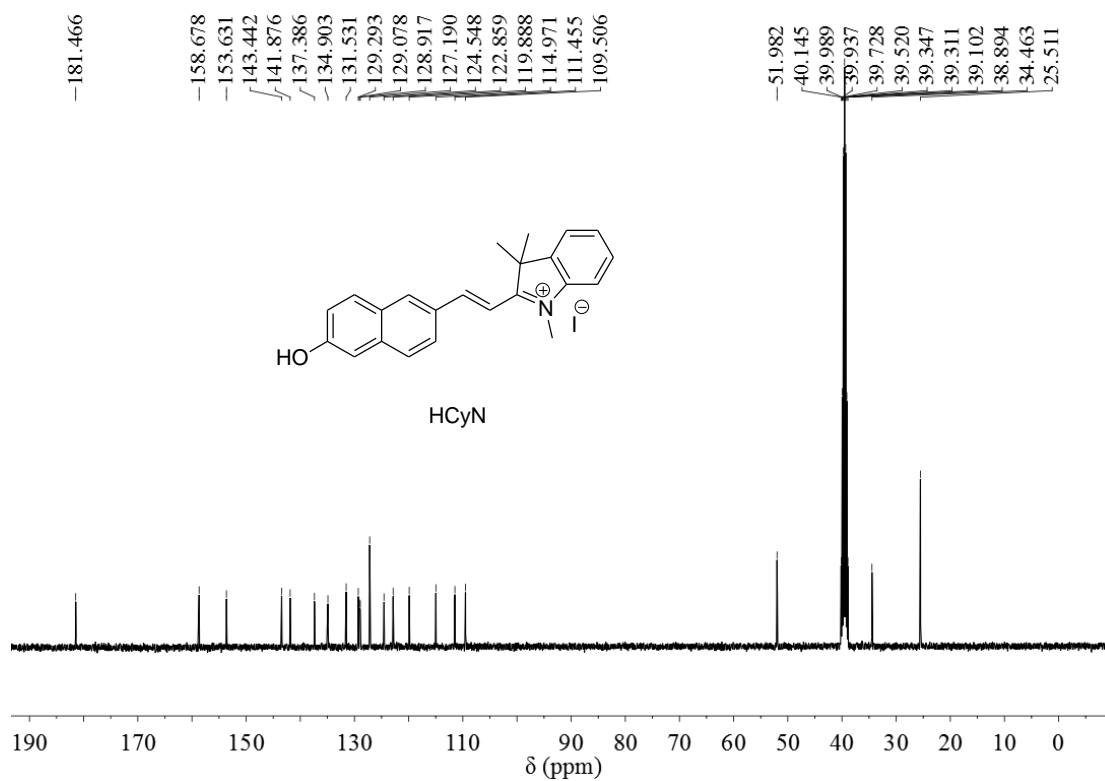

**Fig. S4.** <sup>13</sup>C NMR of HCyN in *d*<sub>6</sub>-DMSO.

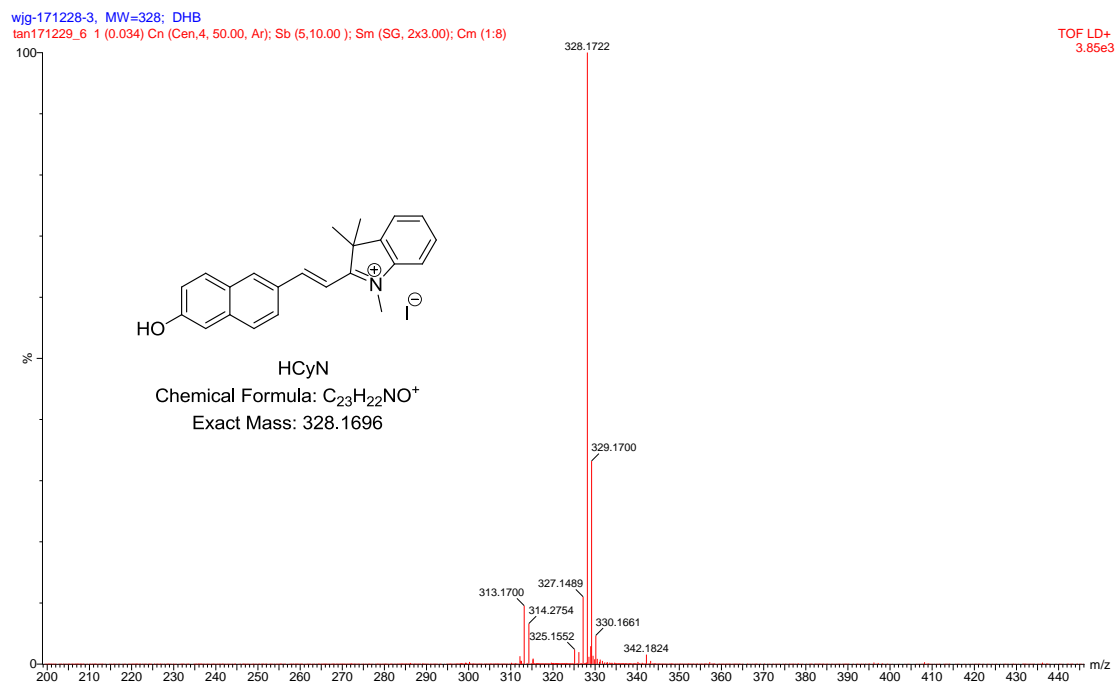

Fig. S5. HRMS spectrum of HCyN.

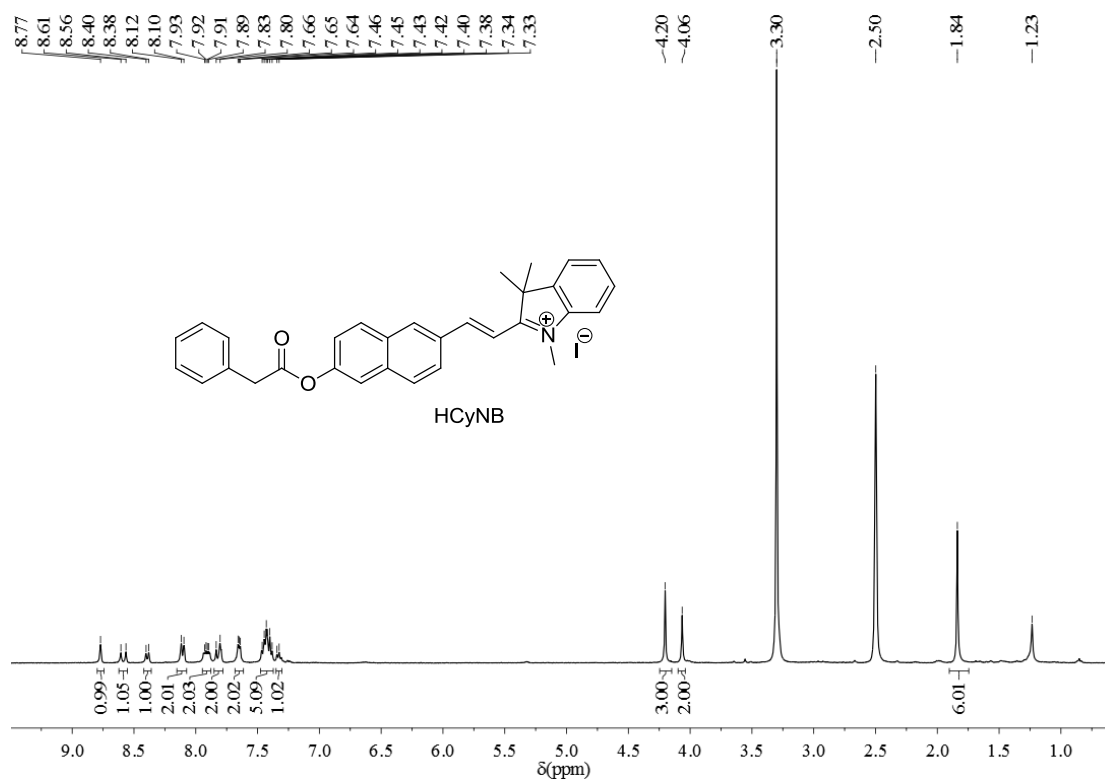

Fig. S6. <sup>1</sup>H NMR of HCyNB in *d*<sub>6</sub>-DMSO.

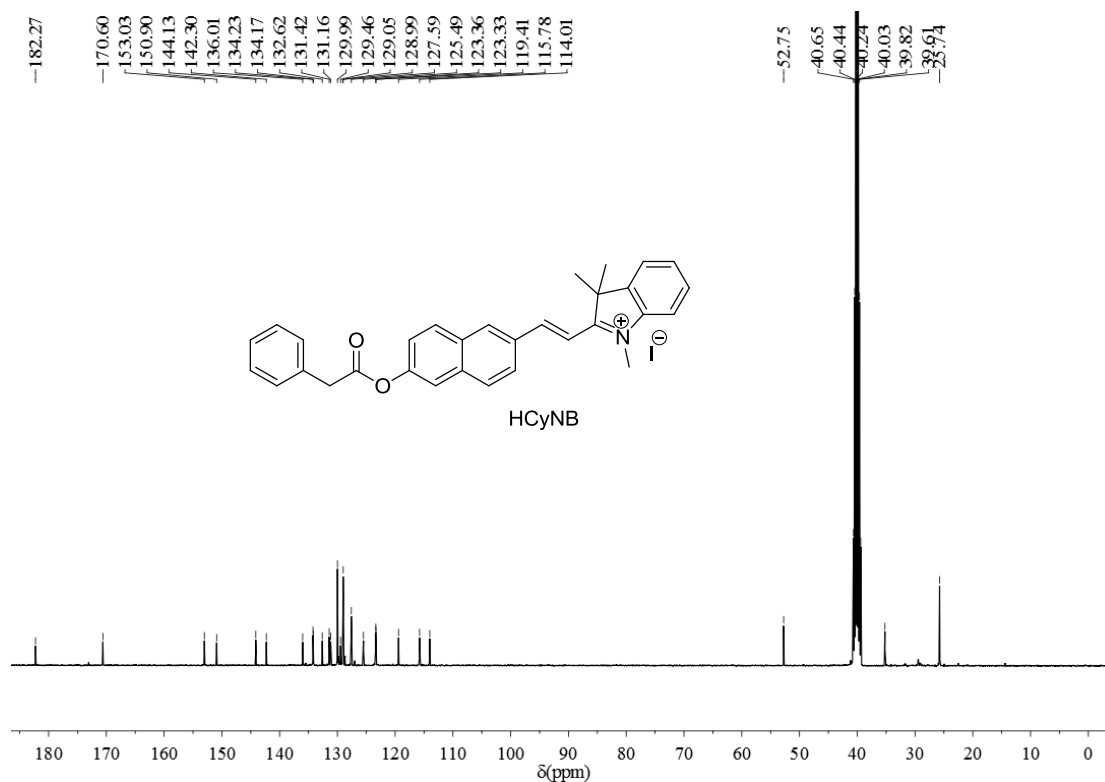

**Fig. S7.**  $^{13}\text{C}$  NMR of HCyNB in  $d_6$ -DMSO.

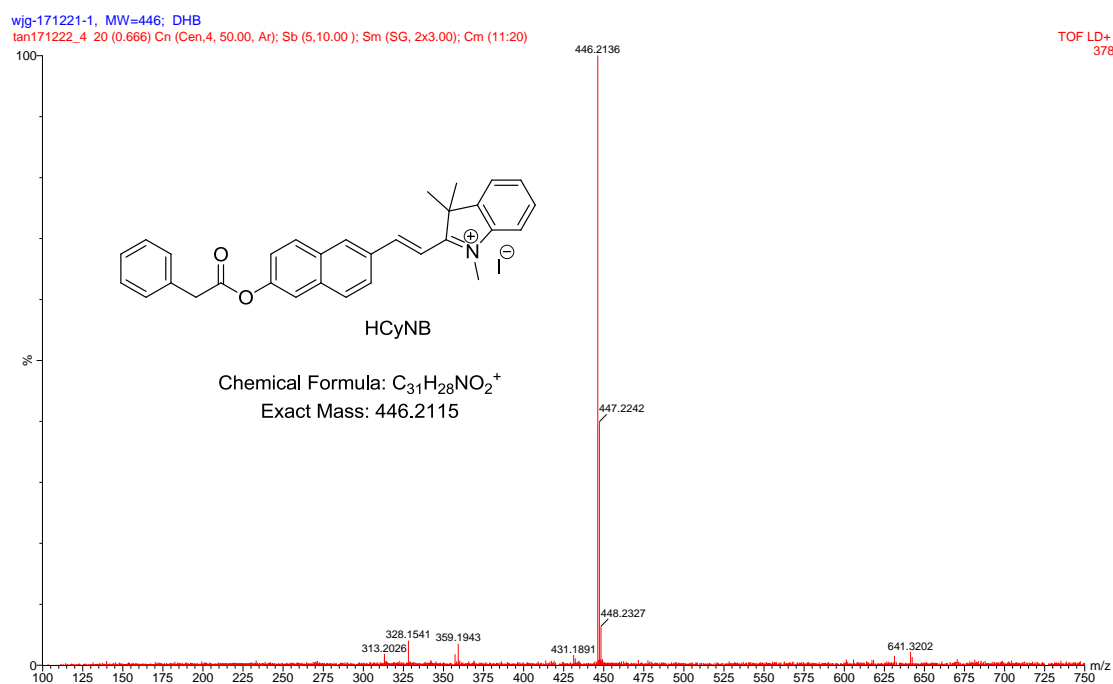

**Fig. S8.** HRMS spectrum of HCyNB.

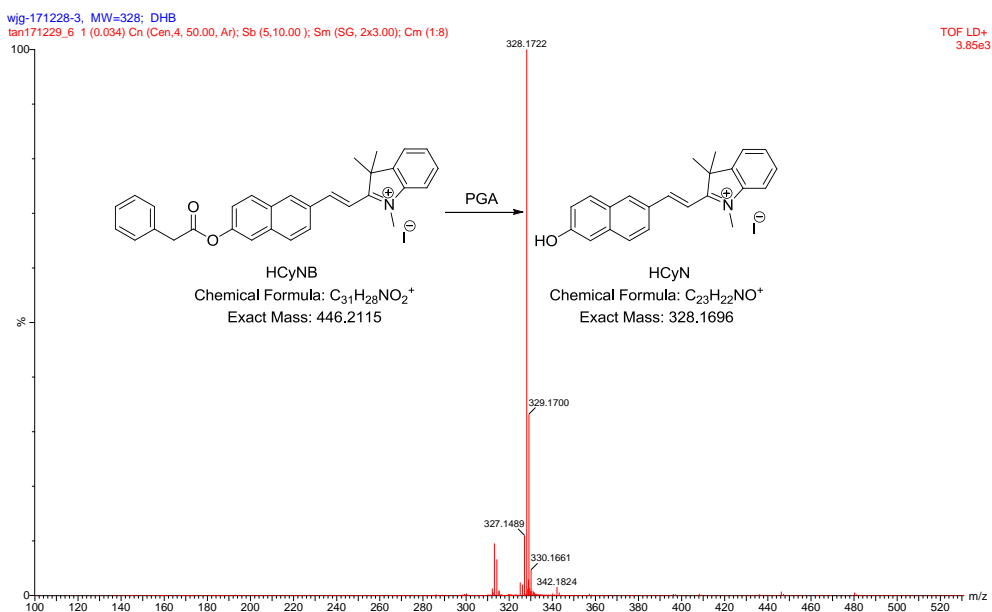

**Fig. S9.** HRMS spectrum of HCyNB after incubation with PGA (0.1 U/mL) for 15 min at 37 °C.

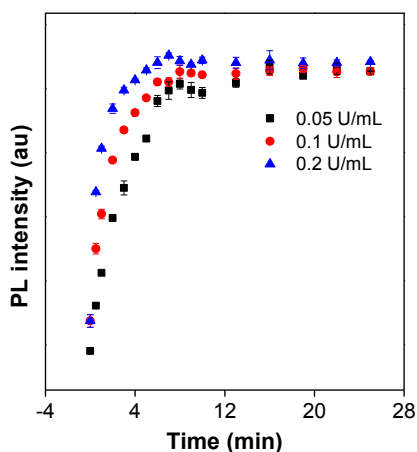

**Fig. S10.** The fluorescence intensity at 593 nm of HCyNB (10  $\mu$ M) incubated with different concentrations of PGA as a function of time. ( $E_{ex} = 443$  nm).

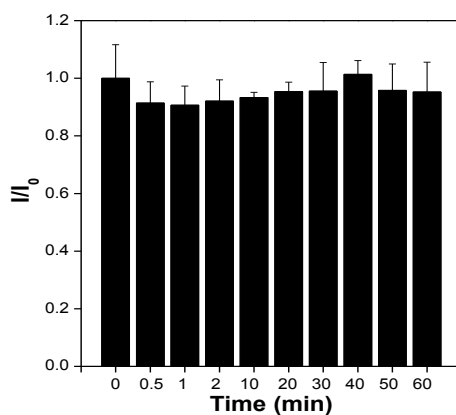

**Fig. S11.** Stability of HCyNB.  $I_t/I_0$  is the fluorescence intensity ratio at 570 nm after and before t-minute incubation at 37 °C.

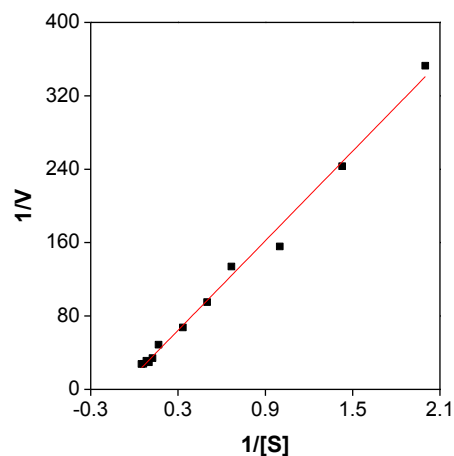

**Fig. S12.** Lineweaver-Burk plot for the enzyme-catalyzed reaction. The Michaelis-Menten equation was described as:  $V=V_{\max}[S]/(K_m+[S])$ , where  $V$  is the reaction rate,  $[S]$  is the concentration of the probe HCyNB, and  $K_m$  is the Michaelis constant. Points were fitted using a linear regression model (correlation coefficient  $R^2 = 0.992$ ).  $Y=162.73X+15.56$ .

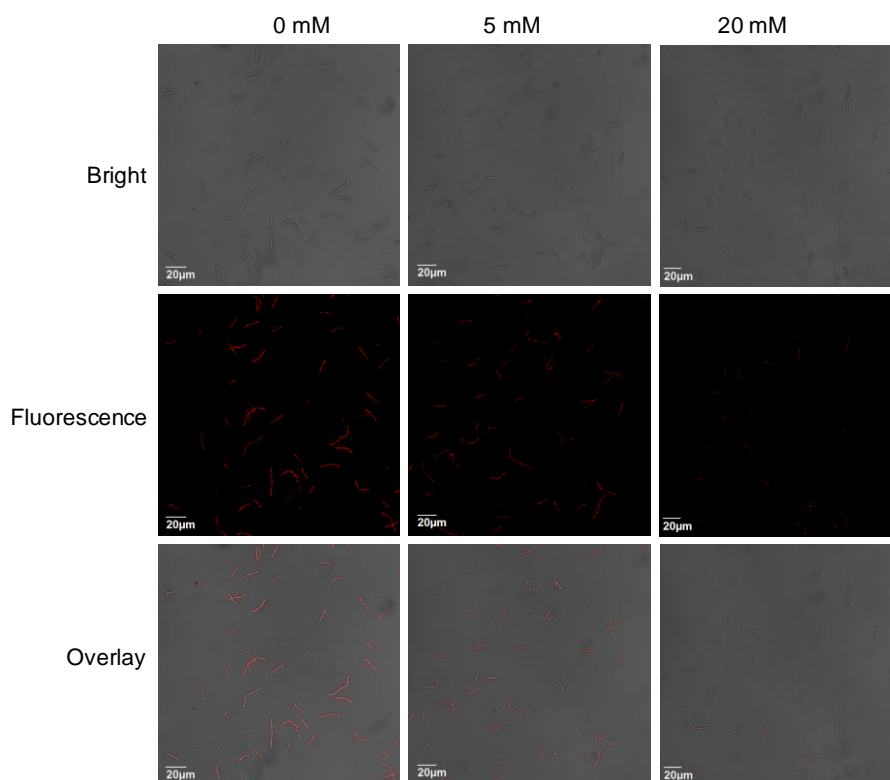

**Fig. S13.** Confocal fluorescence microscope images of HCyNB in penicillinase-producing *Bacillus cereus* strain CMCCB 63301 in the presence of different concentrations (0, 5 and 20 mM) of PGA inhibitor (penicillin G sodium salt).



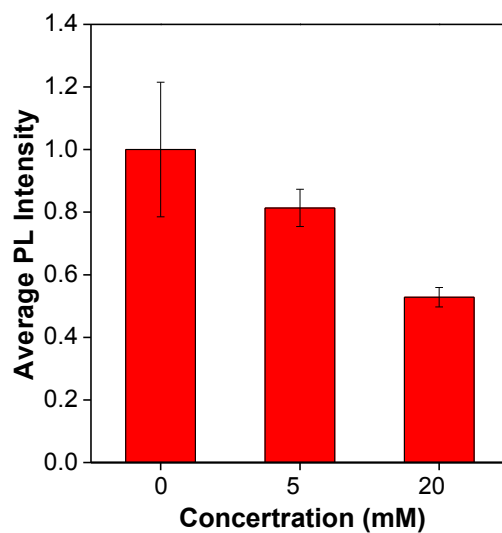

**Fig. S14.** Average PL intensity of probe HCyNB in penicillinase-producing *Bacillus cereus* strain CMCCB 63301 vs the concentration of PGA inhibitor.
